# Supplementary material for: Integrative Insight into Relationships between Florivorous Thrips Haplothrips leucanthemi and H. niger (Insecta, Thysanoptera)
Source: MDPI journal article supplement (doi:10.3390/insects13030279), 2022-03-11
Supplement: s1 [file s1]

**Table S1.** Thermocycling conditions for a routine amplification of selected mitochondrial and nuclear markers.

|                      | <b>COI</b>                                        | <b>28S</b>                                                      | <b>ITS2</b>                                                           |
|----------------------|---------------------------------------------------|-----------------------------------------------------------------|-----------------------------------------------------------------------|
| initial denaturation | 94°C / 5 min                                      | 98°C / 1 min                                                    | 94°C / 2 min                                                          |
| cycles               | 94°C / 1 min                                      | 98°C / 10 sec                                                   | 94°C / 15 sec                                                         |
|                      | 51.2°C / 1 min                                    | 45.7°C / 10 sec                                                 | 51.9°C / 15 sec                                                       |
|                      | 72°C / 1 min                                      | 72°C / 45 sec                                                   | 68°C / 30 sec                                                         |
|                      | 35 cycles                                         | 35 cycles                                                       | 35 cycles                                                             |
| final extension      | 72°C / 5 min                                      | 72°C / 5 min                                                    | 68°C / 5 min                                                          |
| polymerase           | Platinum SuperFi Green                            |                                                                 | Platinum II Hot-Start                                                 |
|                      | JumpStart Taq ReadyMix,<br>Sigma-Aldrich, Germany | PCR Master Mix,<br>Invitrogen, Thermo Fisher<br>Scientific, USA | Green PCR Master Mix,<br>Invitrogen, Thermo Fisher<br>Scientific, USA |
